# Supplementary material for: Transition metal diamine complexes with antimicrobial activity against Staphylococcus aureus and methicillin-resistant S. aureus (MRSA)
Source: Royal Society of Chemistry journal article supplement (doi:10.1039/c5md00228a), 2015-01-01

**Supplementary A for  
Transition Metal Diamine Complexes with Antimicrobial Activity Against *Staphylococcus aureus* and**

**Methicillin-Resistant *S. aureus* (MRSA).**

**G. W. Karpin, D. M. Morris, M. T. Ngo, J.S. Merola\* and J. O. Falkinham, III <sup>a</sup>,**

**A1. Proton NMR Spectrum for Complex **3-Ir****

**A2. Proton NMR Spectrum for Complex **4-Ir****

**A3. Proton NMR Spectrum for Complex **5-Ir****

Supplementary A1. Proton NMR Spectrum for Complex **3-Ir**.  
Assignments are given in the experimental section of paper.

Cp CH<sub>3</sub>s

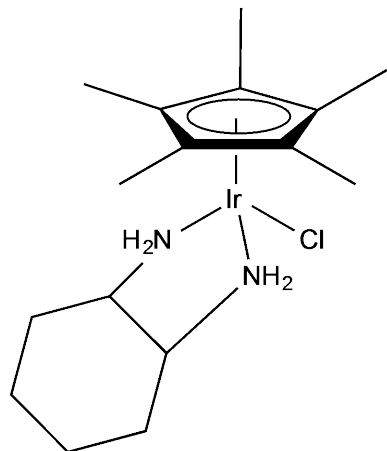

CDCl<sub>3</sub>

TMS

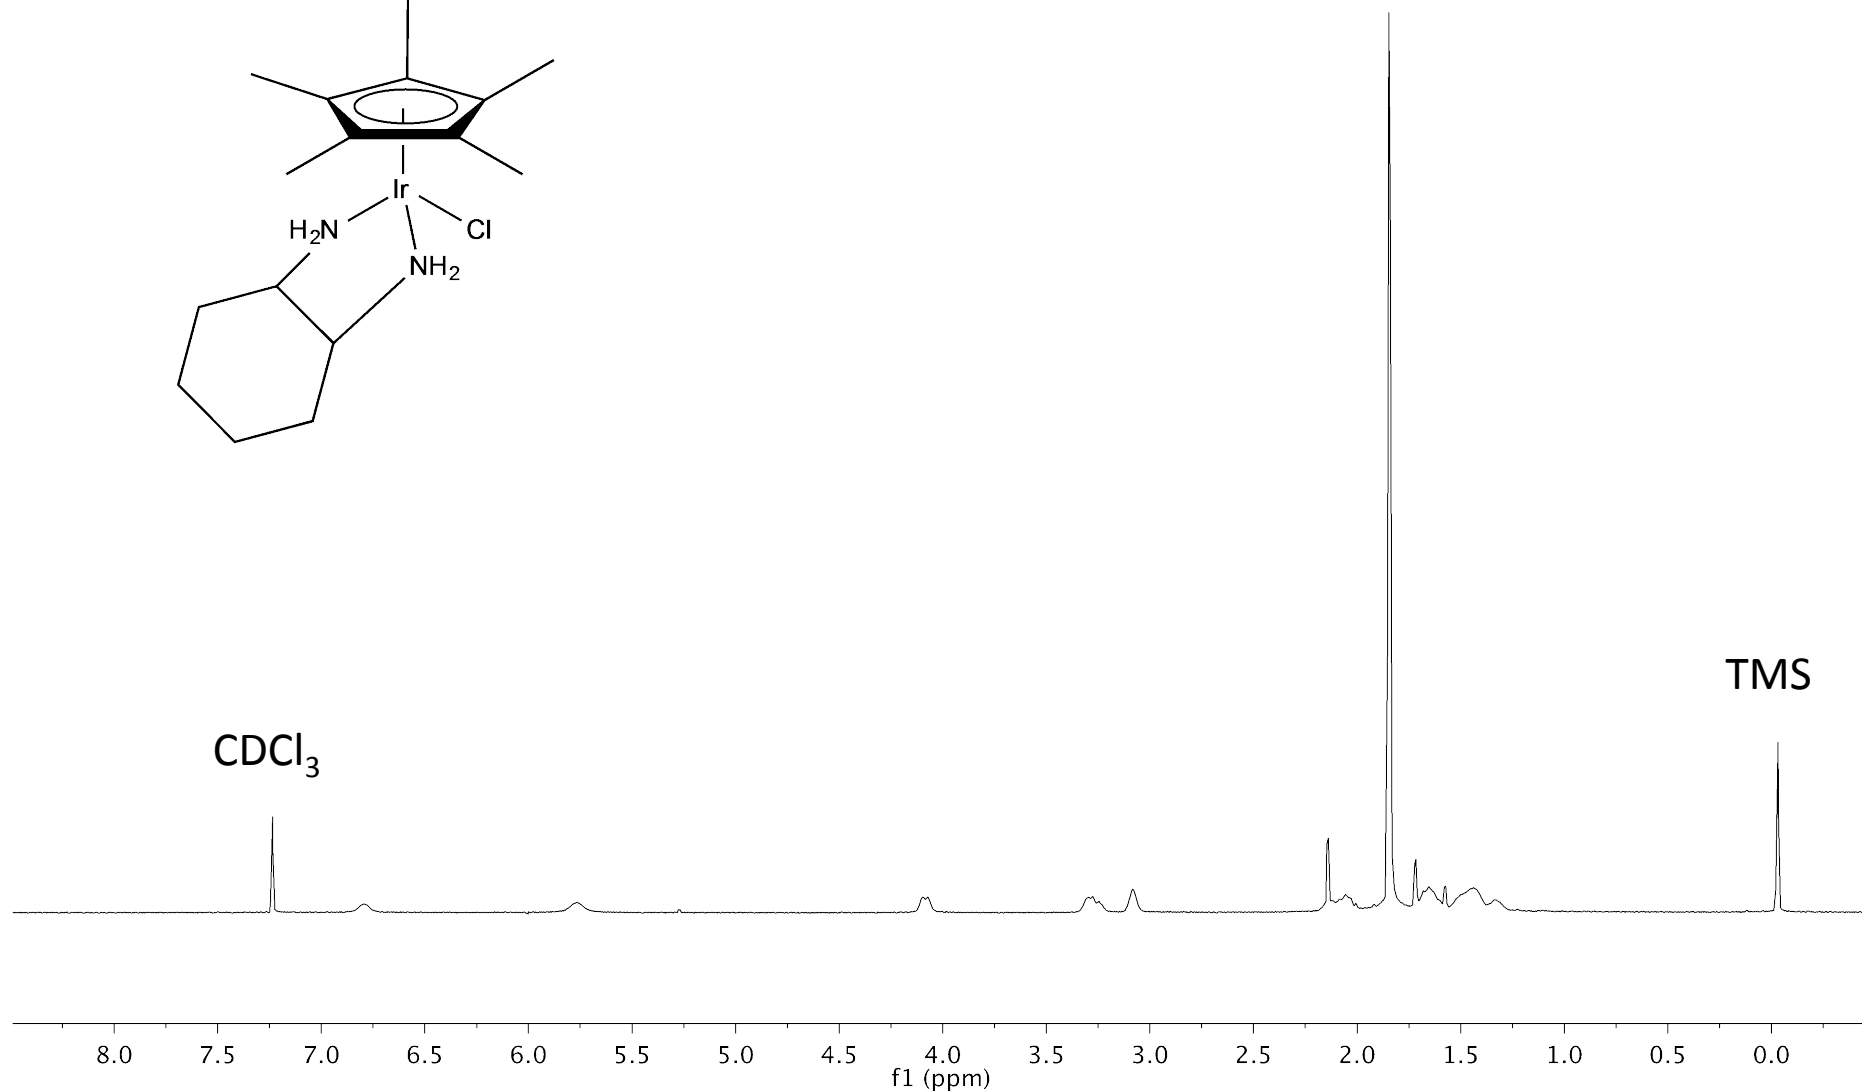

Supplementary A2. Proton NMR Spectrum for Complex **4-Ir**.  
Assignments given in the experimental section of the paper.

$\text{CDCl}_3$

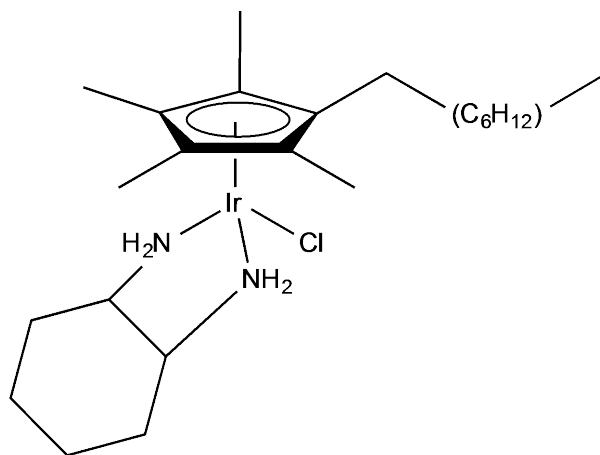

Cp CH<sub>3</sub>s

TMS

8

7

6

5

4

f1 (ppm)

3

2

1

0

Supplementary A3. Proton NMR Spectrum for Complex **5-Ir**.  
Assignments given in the experimental section of the paper.

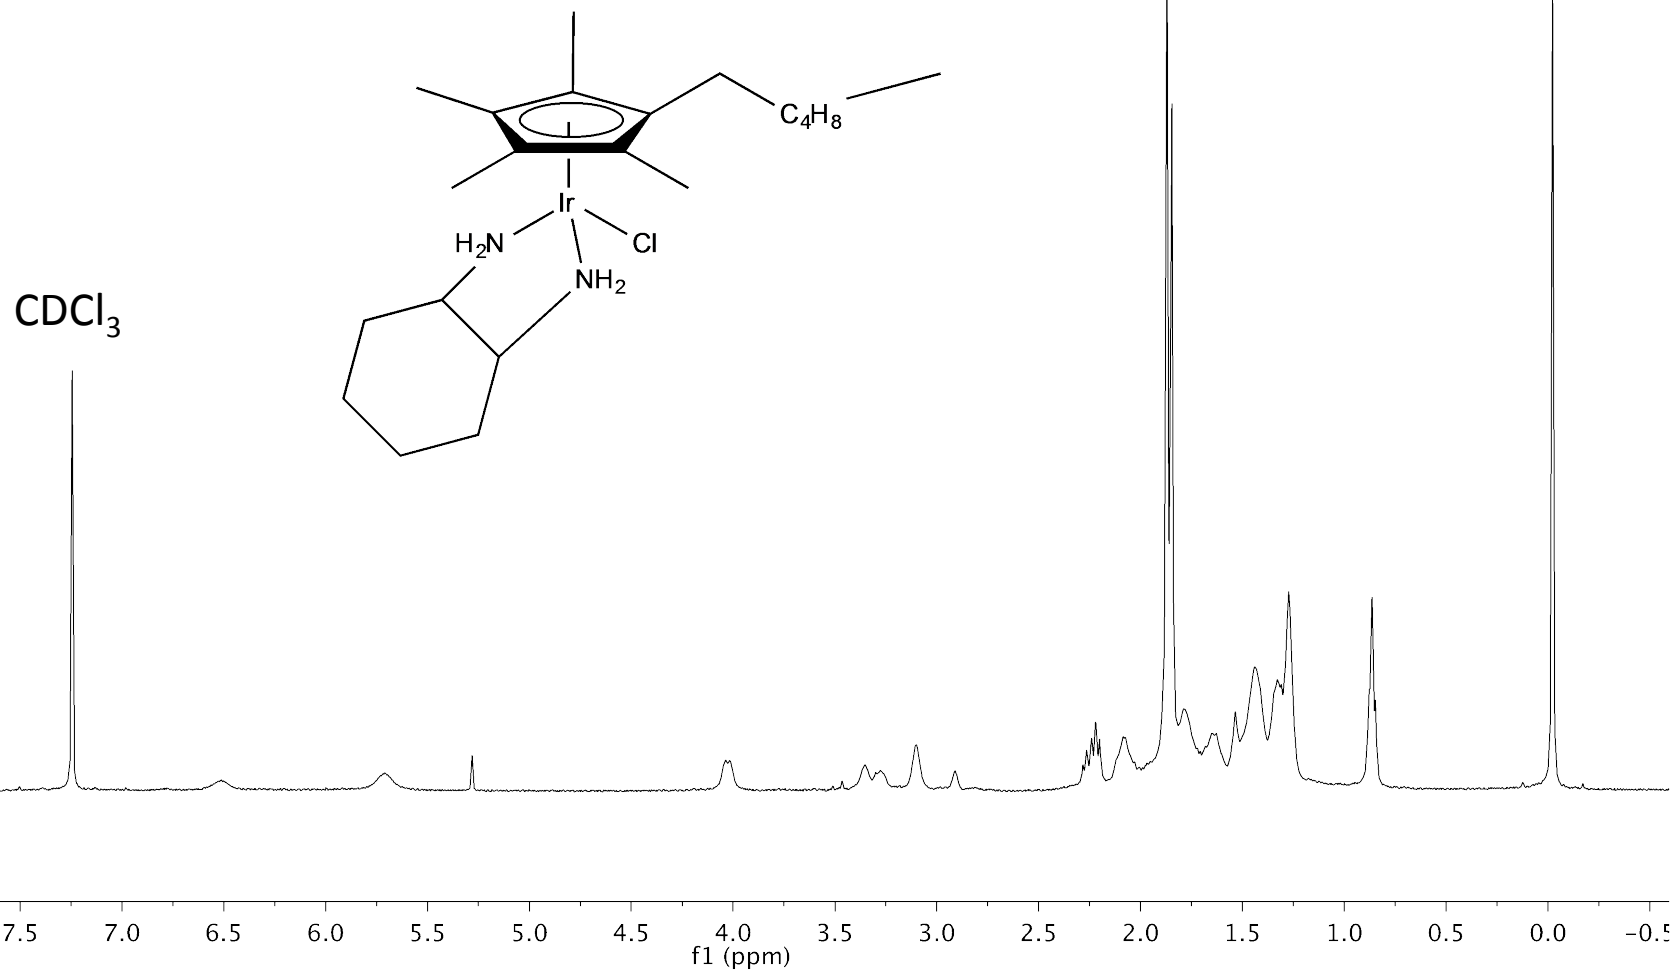

Supplement: c5md00228a2.pdf [file c5md00228a2.pdf]
